# Supplementary material
Source: PubMed Central journal article supplement (PMC8390569)
Supplement: NIHMS1703994-supplement-1.pdf [file NIHMS1703994-supplement-1.pdf]

**Table S1. Characteristics of missing participants compared with total population.**

| <b>Characteristics</b>             | <b>Total Population<br/>(n=2253)</b> | <b>Missing<br/>(n=261)</b> |
|------------------------------------|--------------------------------------|----------------------------|
| Age, years                         | 73.2 (9.0)                           | 73.3 (10.0)                |
| Male Sex                           | 1349 (60)                            | 155 (59)                   |
| Black Race                         | 564 (25)                             | 97 (37)                    |
| Some College or Greater            | 1597 (71)                            | 176 (67)                   |
| Body mass index, kg/m <sup>2</sup> | 29.5 (4.9)                           | 29.6 (6.1)                 |
| Current Smoking                    | 198 (16.2)                           | 22(14)                     |
| Depression Score                   | 3.0 (4.0)                            | 2.6 (3.4)                  |
| eGFR, mL/min/1.73m <sup>2</sup>    | 45.9 (10.4)                          | 42.9 (11.7)                |
| Urine creatinine                   | 124.2 (73.9)                         | 118.8 (75.0)               |
| SBP, mmHg                          | 139.7 (16.3)                         | 139.5 (17.3)               |
| DBP, mmHg                          | 74.4 (12.2)                          | 73.9 (13.7)                |
| Treated by diuretic                | 1211 (54)                            | 157 (60.2)                 |
| Treated by ARB or ACEi             | 1404 (62)                            | 155 (59.4)                 |
| LDL Cholesterol                    | 105.9 (34.6)                         | 103.7 (31.0)               |
| <b>Biomarkers</b>                  |                                      | <b>Median (IQR)</b>        |
| IL-18, pg/mL                       | 30.9 (16.5, 56.9)                    | 29.3 (14.1, 58.6)          |
| NGAL, ng/mL                        | 27.9 (14.9, 8.8)                     | 23.7 (11.6, 60.1)          |
| YKL-40, pg/mL                      | 551.1 (218.6, 1268.6)                | 506.4 (162.3, 1273.1)      |
| KIM-1, pg/mL                       | 855.1 (390.5, 1593.4)                | 763.2 (367.0, 1619.8)      |
| MCP-1, pg/mL                       | 180 (90.2, 322.6)                    | 187.5 (84.8, 363.8)        |
| α1M, mg/g                          | 13.5 (7.3, 25.1)                     | 11.8 (5.2, 23.2)           |
| β2M, ng/mL                         | 102.6 (38.9, 324.5)                  | 189.4 (33.9, 597.7)        |
| Umod, ng/mL                        | 6.6 (4.4, 10.0)                      | 5.5 (3.1, 9.0)             |
| Urine Albumin, mg/L                | 16.0 (7, 49)                         | 28.0 (8, 86)               |

Note. Values for continuous variables are given as mean ± standard deviation; those for categorical variables, as count (percentage).

Abbreviations: eGFR, estimated glomerular filtration rate; SBP, systolic blood pressure; DBP, diastolic blood pressure; ARB, angiotensin II receptor blocker; ACEi, angiotensin-converting enzyme inhibitor; LDL, low-density lipoprotein; IL-18, interleukin-18; KIM-1, kidney injury molecule 1; NGAL, neutrophil gelatinase-associated lipocalin; MCP-1, monocyte chemoattractant protein 1; β2M, β-2 microglobulin; α1M, α-1 microglobulin; Umod, uromodulin.

**Table S2. Correlation Matrix**

| Biomarker                            | IL-18 | NGAL  | YKL-40 | KIM-1 | MCP-1 | $\alpha$ 1M | $\beta$ 2M | Umod  | Albumin | eGFRcr-cys |
|--------------------------------------|-------|-------|--------|-------|-------|-------------|------------|-------|---------|------------|
| Log <sub>2</sub> IL-18, pg/mL        | 1.00  |       |        |       |       |             |            |       |         |            |
| Log <sub>2</sub> NGAL, ng/mL         | 0.48  | 1.00  |        |       |       |             |            |       |         |            |
| Log <sub>2</sub> YKL-40, pg/mL       | 0.49  | 0.61  | 1.00   |       |       |             |            |       |         |            |
| Log <sub>2</sub> KIM-1, pg/mL        | 0.64  | 0.37  | 0.41   | 1.00  |       |             |            |       |         |            |
| Log <sub>2</sub> MCP-1, pg/mL        | 0.62  | 0.39  | 0.41   | 0.81  | 1.00  |             |            |       |         |            |
| Log <sub>2</sub> $\alpha$ 1M, mg/g   | 0.38  | 0.17  | 0.18   | 0.41  | 0.41  | 1.00        |            |       |         |            |
| Log <sub>2</sub> $\beta$ 2M, ng/mL   | 0.02  | 0.14  | 0.21   | 0.09  | 0.08  | 0.48        | 1.00       |       |         |            |
| Log <sub>2</sub> Umod, ng/mL         | 0.30  | 0.21  | 0.16   | 0.43  | 0.45  | 0.10        | -0.0007    | 1.00  |         |            |
| Log <sub>2</sub> Urine Albumin, mg/L | 0.34  | 0.26  | 0.24   | 0.37  | 0.33  | 0.51        | 0.25       | -0.02 | 1.00    |            |
| eGFRcr-cys                           | 0.08  | -0.05 | 0.07   | 0.00  | 0.07  | -0.25       | -0.19      | 0.38  | -0.28   | 1.00       |

Note. IL-18, interleukin-18; KIM-1, kidney injury molecule-1; NGAL, neutrophil gelatinase-associated lipocalin; MCP, monocyte chemoattractant protein-1;  $\beta$ 2M,  $\beta$ 2-microglobulin;  $\alpha$ 1M,  $\alpha$ 1-microglobulin; Umod, uromodulin.

**Table S3. Cross-sectional Association between Urine Biomarkers of Kidney Tubule Injury and Dysfunction and Frailty in 2253 SPRINT Participants with CKD using the less fit group as the referent**

| Biomarker                              | Fit (FI < 10)       | Frailty Index           |                      |
|----------------------------------------|---------------------|-------------------------|----------------------|
|                                        |                     | Less fit (10 > FI ≤ 21) | Frail (FI > 21)      |
|                                        |                     | OR (95% CI)             |                      |
| <b>Log<sub>2</sub> IL-18, pg/mL</b>    |                     |                         |                      |
| Unadjusted                             | 0.95 (0.85, 1.07)   | -                       | 1.11 (1.03, 1.20)**  |
| Adjusted <sup>a</sup>                  | 9.93 (0.75, 1.16)   | -                       | 1.06 (0.94, 1.20)    |
| Adjusted + eGFR & albumin <sup>b</sup> | 0.99 (0.78, 1.27)   | -                       | 1.06 (0.93, 1.20)    |
| <b>Log<sub>2</sub> NGAL, ng/mL</b>     |                     |                         |                      |
| Unadjusted                             | 0.96 (0.87, 1.04)   | -                       | 1.08 (1.02, 1.14)    |
| Adjusted <sup>a</sup>                  | 0.82 (0.69, 0.99)   | -                       | 1.02 (0.93, 1.12)    |
| Adjusted + eGFR & albumin              | 0.87 (0.73, 1.04)   | -                       | 0.98 (0.89, 1.08)    |
| <b>Log<sub>2</sub> YKL-40, pg/mL</b>   |                     |                         |                      |
| Unadjusted                             | 1.03 (0.97, 1.10)   | -                       | 1.04 (0.99, 1.08)    |
| Adjusted <sup>a</sup>                  | 1.00 (0.88, 1.13)   | -                       | 1.00 (0.93, 1.07)    |
| Adjusted + eGFR & albumin              | 1.00 (0.87, 1.15)   | -                       | 1.00 (0.93, 1.08)    |
| <b>Log<sub>2</sub> KIM-1, pg/mL</b>    |                     |                         |                      |
| Unadjusted                             | 0.91 (0.84, 0.99)*  | -                       | 1.09 (1.02, 1.16)*   |
| Adjusted <sup>a</sup>                  | 0.85 (0.73, 0.99)*  | -                       | 1.17 (1.06, 1.30)**  |
| Adjusted + eGFR & albumin <sup>b</sup> | 0.91 (0.77, 1.09)   | -                       | 1.12 (1.00, 1.25)    |
| <b>Log<sub>2</sub> MCP-1, pg/mL</b>    |                     |                         |                      |
| Unadjusted                             | 0.90 (0.81, 1.01)   | -                       | 1.12 (1.04, 1.20)**  |
| Adjusted <sup>a</sup>                  | 0.87 (0.72, 1.06)   | -                       | 1.22 (1.08, 1.38)**  |
| Adjusted + eGFR & albumin <sup>b</sup> | 0.92 (0.85, 1.14)   | -                       | 1.22 (1.08, 1.38)**  |
| <b>Log<sub>2</sub> α1M, mg/g</b>       |                     |                         |                      |
| Unadjusted                             | 0.94 (0.84, 1.06)   | -                       | 1.18 (1.09, 1.28)*** |
| Adjusted <sup>a</sup>                  | 0.67 (0.54, 0.84)** | -                       | 1.36 (1.20, 1.55)*** |
| Adjusted + eGFR & albumin <sup>b</sup> | 0.81 (0.62, 1.05)   | -                       | 1.25 (1.08, 1.45)**  |
| <b>Log<sub>2</sub> β2M, ng/mL</b>      |                     |                         |                      |
| Unadjusted                             | 1.02 (0.96, 1.07)   | -                       | 1.02 (0.98, 1.06)    |
| Adjusted <sup>a</sup>                  | 0.92 (0.84, 1.01)   | -                       | 1.03 (0.97, 1.08)    |

Adjusted + eGFR & albumin <sup>b</sup> 0.97 (0.87, 1.07) - 0.99 (0.94, 1.05)

**Log<sub>2</sub> Umod, ng/mL**

Unadjusted 1.01 (0.87, 1.18) - 0.81 (0.73, 0.89)\*\*\*  
 Adjusted<sup>a</sup> 0.99 (0.74, 1.31) - 0.87 (0.74, 1.02)  
 Adjusted + eGFR & albumin <sup>b</sup> 0.80 (0.58, 1.10) - 1.02 (0.87, 1.21)

**Log<sub>2</sub> albumin, mg/L**

Unadjusted 0.95 (0.88, 1.02) - 1.10 (1.06, 1.15)\*\*\*  
 Adjusted<sup>a</sup> 0.82 (0.72, 0.94) - 1.10 (1.03, 1.18)\*\*  
 Adjusted + eGFR 0.88 (0.77, 1.01) - 1.03 (0.96, 1.11)

---

Note. IL-18, interleukin-18; KIM-1, kidney injury molecule-1; NGAL, neutrophil gelatinase-associated lipocalin; MCP, monocyte chemoattractant protein-1; β2M, β2-microglobulin; α1M, α1-microglobulin; Umod, uromodulin.

a Adjusted for age, race, sex, body mass index, alcohol use, years of education, insurance status, baseline systolic and diastolic blood pressure, smoking status, and urine creatinine.

B Adjusted for all variables listed above and estimated glomerular filtration rate (eGFR) and Log<sub>2</sub> albumin.

\*P<0.05; \*\*P<0.01; \*\*\*P<0.001

Table S4. Regression coefficients for full model evaluating  $\beta$ 2M with MoCA score (range 0-30) among 2253 SPRINT Participants with CKD.

|                                       | $\beta$ coefficient | 95% CI        | p-value |
|---------------------------------------|---------------------|---------------|---------|
| $\beta$ 2M                            | -0.09               | -0.17, -0.01  | 0.032   |
| Urine creatinine                      | -0.001              | -0.004, 0.002 | 0.345   |
| eGFR                                  | 0.01                | -0.01, 0.03   | 0.557   |
| Urine albumin                         | 0.00                | -0.10, 0.11   | 0.949   |
| Age (years)                           | -0.11               | -0.14, -0.08  | <0.001  |
| Male Sex                              | -0.98               | -1.45, -0.50  | <0.001  |
| Black Race                            | -2.18               | -2.70, -1.67  | <0.001  |
| Education                             |                     |               |         |
| Less than High School Diploma         | -4.45               | -5.10, -3.79  | <0.001  |
| High School Diploma                   | -1.72               | -2.68, -1.64  | <0.001  |
| Some College or Greater (reference)   | -                   | -             | -       |
| Insurance                             |                     |               |         |
| Medicare (reference)                  | -                   | -             | -       |
| Uninsured                             | -0.71               | -1.74, 0.31   | 0.171   |
| Medicaid                              | 0.44                | -0.45, 1.32   | 0.332   |
| VA                                    | -0.11               | -0.68, 0.47   | 0.714   |
| Private                               | 0.55                | 0.06, 1.03    | 0.028   |
| Depression Score                      | -0.03               | -0.08, 0.02   | 0.217   |
| Currently Smoking                     | 0.26                | -0.34, 0.86   | 0.395   |
| Body Mass Index                       | 0.02                | -0.02, 0.06   | 0.256   |
| Any alcohol use in the last 12 months | 1.20                | 0.27, 2.13    | 0.011   |
| Use of diuretic                       | -0.21               | -0.62, 0.20   | 0.312   |
| Use of an ARB                         | 0.60                | 0.07, 1.14    | 0.028   |
| Use of Ace inhibitor                  | -0.21               | -0.64, 0.23   | 0.35    |
| SBP                                   | -0.01               | -0.22, 0.01   | 0.31    |
| DBP                                   | 0.03                | 0.01, 0.05    | 0.008   |

Abbreviations:  $\beta$ 2M,  $\beta$ -2 microglobuline; GFR, estimated glomerular filtration rate; SBP, systolic blood pressure; DBP, diastolic blood pressure; ARB, angiotensin II receptor blocker; ACEi, angiotensin-converting enzyme inhibitor

Table S5. Odds Ratio for the full model evaluating  $\alpha$ 1M with being in the frail category compared with fit group (less fit group omitted) among 2253 SPRINT Participants with CKD.

|                                       | Odds Ratio | 95% CI      | p-value |
|---------------------------------------|------------|-------------|---------|
| $\alpha$ 1M                           | 1.48       | 1.11, 1.96  | 0.007   |
| Urine creatinine                      | 1.00       | 1.00, 1.00  | 0.854   |
| eGFR                                  | 0.92       | 0.95        | <0.001  |
| Urine albumin                         | 1.05       | 0.89, 1.24  | 0.56    |
| Age (years)                           | 1.030      | 0.99, 1.07  | 0.189   |
| Male Sex                              | 0.65       | 0.33, 1.27  | 0.208   |
| Black Race                            | 0.860      | 0.43, 1.70  | 0.664   |
| Education                             |            |             |         |
| Less than High School Diploma         | 2.24       | 0.92, 5.48  | 0.076   |
| High School Diploma                   | 1.480      | 0.73, 2.99  | 0.275   |
| Some College or Greater (reference)   | -          | -           | -       |
| Insurance                             |            |             |         |
| Medicare (reference)                  | -          | -           | -       |
| Uninsured                             | 1.93       | 0.20, 18.24 | 0.565   |
| Medicaid                              | 1.070      | 0.30, 3.89  | 0.916   |
| VA                                    | 2.17       | 1.02, 4.61  | 0.045   |
| Private                               | 0.96       | 0.52, 1.75  | 0.889   |
| Depression Score                      | 2.14       | 1.77, 2.59  | <0.001  |
| Currently Smoking                     | 3.77       | 1.31, 10.89 | 0.014   |
| Body Mass Index                       | 1.150      | 1.08, 1.22  | <0.001  |
| Any alcohol use in the last 12 months | 0.54       | 0.16, 1.82  | 0.322   |
| Use of diuretic                       | 2.29       | 1.33, 3.96  | 0.003   |
| Use of an ARB                         | 1.14       | 0.54, 2.41  | 0.729   |
| Use of Ace inhibitor                  | 1.210      | 0.69, 2.11  | 0.51    |
| SBP                                   | 1.0200     | 1.003, 1.04 | 0.026   |
| DBP                                   | 0.98       | 0.96, 1.01  | 0.216   |

Abbreviations:  $\alpha$ 1M,  $\alpha$ -1 microglobulin; GFR, estimated glomerular filtration rate; SBP, systolic blood pressure; DBP, diastolic blood pressure; ARB, angiotensin II receptor blocker; ACEi, angiotensin-converting enzyme inhibitor
